# Supplementary material
Source: Research Square preprint supplement (doi:10.21203/rs.3.rs-10170376/v1)
Supplement: Supplementary file 1 [file 8f259da6f75befbae4285966.docx]

**Supplementary Materials**

Supplementary Table 1 Baseline characteristics of students (PP analysis)

| **Characteristics** | **Control(n=212)** | **Intervention(n=229)** | ***P*** |
| --- | --- | --- | --- |
| Sex, n (%) |  |  |  |
| Male | 112 (52.8%) | 120 (52.4%) |  |
| Female | 100 (47.2%) | 109 (47.6%) | 1.000 |
| Area, n (%) |  |  |  |
| Urban | 126 (59.4%) | 137 (59.8%) |  |
| Rural | 86 (40.6%) | 92 (40.2%) | 1.000 |
| Age (years) | 8.00 (8.00, 8.00) | 8.30 (8.10, 8.60) | <0.001 |
| Height (cm) | 132.05 (127.78, 135.93) | 132.50 (128.60, 136.60) | 0.307 |
| Weight (kg) | 27.45 (24.68, 32.82) | 27.60 (25.20, 32.00) | 0.690 |
| BMI (kg/m2) | 15.77 (14.59, 18.11) | 15.84 (14.69, 17.77) | 0.962 |
| Systolic BP (mmHg) | 99.88 ± 10.06 | 97.32 ± 8.57 | 0.004 |
| Diastolic BP (mmHg) | 63.31 ± 7.18 | 63.71 ± 6.87 | 0.547 |
| 24h Urinary Sodium (g/d) | 1.83 (1.38, 2.41) | 1.86 (1.34, 2.49) | 0.899 |
| 24h Urinary Potassium (g/d) | 0.82 (0.60, 1.10) | 0.85 (0.65, 1.13) | 0.382 |
| Urinary Na/K ratio | 2.26 (1.69, 3.08) | 2.18 (1.56, 2.94) | 0.375 |
| Total KAP score | 41.67 (33.33, 58.33) | 41.67 (33.33, 58.33) | 0.540 |
| Home lunch (days/week) | 2.00 (2.00, 5.25) | 2.00 (2.00, 2.00) | <0.001 |
| Total home meals (times/week) | 2.00 (2.00, 6.00) | 2.00 (2.00, 2.00) | <0.001 |

Note: Data are presented as mean ± SD for normally distributed variables and as median (P25, P75) for non-normally distributed variables, unless otherwise indicated. Categorical variables are shown as n (%). Percentages were calculated based on respondents with available data. *P* values were derived from independent-samples t-tests or Welch's t-test for normally distributed continuous variables, Mann–Whitney U tests for non-normal continuous variables, and chi-square or Fisher's exact tests for categorical variables. Abbreviations as in Table 1.

Supplementary Table 2 Baseline characteristics of parents (PP analysis)

| **Characteristics** | **Control(n=212)** | **Intervention(n=229)** | ***P*** |
| --- | --- | --- | --- |
| Sex, n (%) |  |  |  |
| Male | 81 (38.2%) | 80 (34.9%) |  |
| Female | 131 (61.8%) | 149 (65.1%) | 0.539 |
| Area, n (%) |  |  |  |
| Urban | 126 (59.4%) | 137 (59.8%) |  |
| Rural | 86 (40.6%) | 92 (40.2%) | 1.000 |
| Education, n (%) |  |  |  |
| No schooling | 0 (0.0%) | 0 (0.0%) |  |
| Primary | 57 (26.9%) | 69 (30.1%) |  |
| Junior high | 83 (39.2%) | 136 (59.4%) |  |
| High school/vocational | 24 (11.3%) | 11 (4.8%) |  |
| College degree or higher | 48 (22.6%) | 13 (5.6%) | <0.001 |
| Annual household income, n (%) | |  |  |
| <25k | 18 (8.5%) | 24 (10.5%) |  |
| 25k-<50k | 166 (78.3%) | 154 (67.2%) |  |
| 50k-<100k | 18 (8.5%) | 35 (15.3%) |  |
| 100k+ | 10 (4.7%) | 16 (7.0%) | 0.058 |
| Age (years) | 37.00 (33.00, 55.00) | 34.90 (32.80, 40.70) | <0.001 |
| Height (cm) | 161.00 (156.47, 168.00) | 161.60 (157.50, 169.60) | 0.092 |
| Weight (kg) | 64.40 (56.60, 74.05) | 61.50 (54.80, 73.20) | 0.277 |
| BMI (kg/m2) | 24.76 (22.14, 27.90) | 23.98 (21.49, 26.51) | 0.014 |
| Systolic BP (mmHg) | 116.67 (106.25, 130.08) | 110.00 (102.00, 122.33) | <0.001 |
| Diastolic BP (mmHg) | 76.33 (69.67, 84.75) | 74.00 (68.00, 80.67) | 0.006 |
| Family size (persons) | 3.00 (2.00, 4.00) | 2.00 (2.00, 3.00) | <0.001 |
| 24h Urinary Sodium (g/d) | 3.45 (2.43, 4.45) | 3.29 (2.38, 4.26) | 0.440 |
| 24h Urinary Potassium (g/d) | 1.17 (0.90, 1.61) | 1.31 (0.95, 1.67) | 0.117 |
| Urinary Na/K ratio | 2.78 (2.11, 3.70) | 2.53 (1.89, 3.60) | 0.021 |
| Total KAP score | 53.33 (46.67, 66.67) | 60.00 (46.67, 73.33) | 0.015 |

Note: Data are presented as mean ± SD for normally distributed variables and as median (P25, P75) for non-normally distributed variables, unless otherwise indicated. Categorical variables are shown as n (%). Percentages were calculated based on respondents with available data. *P* values were derived from independent-samples t-tests or Welch's t-test for normally distributed continuous variables, Mann–Whitney U tests for non-normal continuous variables, and chi-square or Fisher's exact tests for categorical variables. Abbreviations as in Table 2.

Supplementary Table 3 Comprehensive LMM analysis of KAP, urinary electrolytes, and meal frequency (PP analysis).

|  | **Control group** | | | **Intervention group** | | | **Intervention Effect** | |
| --- | --- | --- | --- | --- | --- | --- | --- | --- |
| **Variables** | **Baseline** | **Follow-up** | **Change (95% *CI*)** | **Baseline** | **Follow-up** | **Change (95% *CI*)** | **Net Difference (95% *CI*)** | ***P* value** |
| Student Total KAP Score | 47.2±1.2 | 53.4±1.2 | 6.88 (1.39, 12.37) | 45.7±1.2 | 67.8±1.3 | 21.43 (16.86, 25.99) | 13.66 (6.09, 21.23) | <0.001 |
| Student Knowledge | 41.4±1.4 | 49.6±1.4 | 9.05 (0.63, 17.47) | 41.8±1.4 | 72.9±1.4 | 30.82 (25.40, 36.24) | 21.42 (10.54, 32.31) | <0.001 |
| Student Attitude | 55.9±3.5 | 49.5±3.5 | -5.23 (-14.96, 4.49) | 52.5±3.4 | 62.1±3.3 | 8.87 (-5.19, 22.93) | 38.24 (25.55, 50.93) | <0.001 |
| Student Practice | 44.1±1.3 | 48.9±1.4 | 4.88 (0.69, 9.07) | 40.5±1.2 | 48.3±1.5 | 6.50 (2.36, 10.64) | -4.86 (-10.34, 0.62) | 0.082 |
| Parent Total KAP Score | 54.5±1.2 | 54.9±1.1 | 0.35 (-3.83, 4.53) | 57.8±1.2 | 67.0±1.0 | 9.16 (5.55, 12.77) | 3.60 (1.86, 5.34) | <0.001 |
| Parent Knowledge | 56.9±1.5 | 59.5±1.5 | 1.94 (-4.98, 8.85) | 65.8±1.5 | 85.8±1.2 | 18.88 (13.31, 24.46) | 12.61 (9.47, 15.75) | <0.001 |
| Parent Attitude | 72.4±2.4 | 72.1±2.5 | 0.00 (-10.91, 10.91) | 74.2±2.3 | 75.1±2.3 | 0.25 (-8.65, 9.14) | -1.58 (-5.74, 2.59) | 0.459 |
| Parent Practice | 46.2±1.4 | 45.7±1.3 | -0.91 (-7.66, 5.83) | 45.6±1.4 | 49.0±1.4 | 3.38 (-1.97, 8.73) | -2.64 (-4.63, -0.64) | 0.010 |
| Student 24h Na (g/day) | 2.1±0.1 | 2.2±0.1 | 0.04 (-0.22, 0.31) | 2.0±0.1 | 2.3±0.1 | 0.31 (0.02, 0.60) | 0.30 (-0.01, 0.60) | 0.057 |
| Student 24h NaCl (g/day) | 5.3±0.2 | 5.6±0.2 | 0.11 (-0.56, 0.78) | 5.1±0.1 | 6.0±0.2 | 0.79 (0.05, 1.52) | 0.75 (-0.02, 1.52) | 0.057 |
| Student 24h K (g/day) | 0.9±0.0 | 0.9±0.0 | -0.04 (-0.12, 0.04) | 0.9±0.0 | 0.9±0.0 | 0.00 (-0.10, 0.11) | 0.20 (0.12, 0.29) | <0.001 |
| Student 24h Cre (mmol/day) | 0.6±0.0 | 0.6±0.0 | 0.03 (-0.02, 0.08) | 0.5±0.0 | 0.6±0.0 | 0.06 (0.02, 0.10) | 0.04 (-0.02, 0.11) | 0.156 |
| Student Na/K Ratio | 2.5±0.1 | 2.6±0.1 | 0.08 (-0.18, 0.33) | 2.4±0.1 | 2.7±0.1 | 0.27 (-0.09, 0.63) | 0.14 (-0.22, 0.51) | 0.437 |
| Parent 24h Na (g/day) | 3.7±0.1 | 3.5±0.1 | -0.18 (-0.71, 0.35) | 3.5±0.1 | 3.4±0.1 | -0.01 (-0.52, 0.51) | -0.28 (-0.48, -0.09) | 0.004 |
| Parent 24h NaCl (g/day) | 9.4±0.3 | 9.0±0.3 | -0.46 (-1.81, 0.90) | 8.3±0.3 | 8.7±0.3 | -0.02 (-1.32, 1.28) | -0.72 (-1.22, -0.23) | 0.004 |
| Parent 24h K (g/day) | 1.3±0.0 | 1.4±0.0 | 0.01 (-0.19, 0.20) | 1.4±0.0 | 1.3±0.0 | -0.11 (-0.32, 0.11) | -0.02 (-0.09, 0.04) | 0.472 |
| Parent 24h Cre (mmol/day) | 1.2±0.0 | 1.1±0.0 | -0.02 (-0.14, 0.09) | 1.1±0.0 | 1.1±0.0 | -0.03 (-0.10, 0.03) | 0.04 (0.01, 0.07) | 0.012 |
| Parent Na/K Ratio | 3.1±0.1 | 2.8±0.1 | -0.29 (-0.67, 0.09) | 2.7±0.1 | 2.9±0.1 | 0.17 (-0.22, 0.56) | 0.05 (-0.09, 0.19) | 0.483 |
| Weekly Home Lunch Frequency | 3.5±0.2 | 3.2±0.2 | -0.23 (-0.68, 0.22) | 2.2±0.1 | 2.0±0.1 | -0.22 (-0.47, 0.03) | -0.27 (-0.59, 0.06) | 0.106 |
| Weekly Total Home Meals | 16.6±0.2 | 16.1±0.2 | -0.51 (-1.27, 0.26) | 15.5±0.1 | 15.0±0.1 | -0.46 (-0.99, 0.07) | -0.31 (-1.12, 0.50) | 0.453 |

Note: Data are expressed as mean ± standard deviation (SD) for baseline and follow-up values. Within-group changes, net differences between groups, and corresponding 95% confidence intervals (CIs) and *P* values were estimated using Linear Mixed-effects Models (LMM). The models included treatment group, time, and their interaction (group × time) as fixed effects, and family ID as a random effect to account for household clustering. Analyses were conducted under the ITT framework. Missing data were handled using Multiple Imputation by Chained Equations (MICE). Abbreviations as in Table 3.

Supplementary Table 4 Cross-pair Pearson correlations between matched students and parents (PP analysis)

| **Biomarker** | **Group** | **n (BL/FU)** | **Baseline r** | **Follow-up r** | ***Δr*** | ***P (Δr)*** |
| --- | --- | --- | --- | --- | --- | --- |
| Sodium (Na) | Intervention | 213/203 | 0.093 | 0.095 | 0.002 | 0.985 |
|  | Control | 183/172 | 0.263*** | 0.057 | -0.206 | 0.048 |
|  | Between-group | - | - | - | Con:-0.206 Int:0.002 | 0.155 |
| Potassium (K) | Intervention | 213/203 | 0.216** | 0.189** | -0.027 | 0.778 |
|  | Control | 183/172 | 0.333*** | 0.124 | -0.209 | 0.038 |
|  | Between-group | - | - | - | Con:-0.209 Int:-0.027 | 0.210 |
| Na/K ratio | Intervention | 203/203 | 0.287*** | 0.159* | -0.128 | 0.177 |
|  | Control | 172/172 | 0.198** | 0.104 | -0.094 | 0.374 |
|  | Between-group | - | - | - | Con:-0.094 Int:-0.128 | 0.820 |
| Creatinine | Intervention | 203/203 | -0.044 | 0.052 | +0.095 | 0.339 |
|  | Control | 183/172 | 0.249*** | -0.007 | -0.256 | 0.015 |
|  | Between-group | - | - | - | Con:-0.256 Int:+0.095 | 0.016 |

Note:Values are Pearson correlation coefficients between matched student–parent pairs. *Δr* = follow-up r − baseline r. *P* values for *Δr* derived from Fisher z-transformation comparing independent correlations. Between-group *P* values compare *Δr* between intervention and control groups. *** *P*<0.001, ** *P*<0.01, * *P*<0.05. BL, baseline; FU, follow-up.

Supplementary Table 5 Multivariate linear regression of changes in 24-h urinary biomarkers (PP analysis)

| **Predictor** | **Intervention** | | | **Control** | | | **Full model** | | |
| --- | --- | --- | --- | --- | --- | --- | --- | --- | --- |
|  | ***P*** | ***P*** | ***P*** | ***P*** | ***P*** | ***P*** | ***P*** | ***P*** | ***P*** |
| **24-hour urinary sodium (g/day)** | | | | | | | | | |
| Intercept | 0.82 | 2.54 | 0.748 | 0.22 | 1.47 | 0.883 | 0.17 | 1.19 | 0.888 |
| School lunch frequency | -0.25 | 0.16 | 0.107 | -0.02 | 0.05 | 0.592 | -0.03 | 0.04 | 0.511 |
| Family salt load | -0.02 | 0.03 | 0.498 | -0.02 | 0.01 | 0.030* | -0.02 | 0.01 | 0.020* |
| Age | 0.12 | 0.26 | 0.640 | 0.02 | 0.18 | 0.919 | 0.05 | 0.15 | 0.750 |
| Male sex | -0.12 | 0.20 | 0.561 | 0.24 | 0.18 | 0.178 | 0.06 | 0.13 | 0.648 |
| Intervention group | - | - | - | - | - | - | 0.99 | 0.89 | 0.262 |
| Group x School lunch | - | - | - | - | - | - | -0.20 | 0.16 | 0.200 |
| Group x Family salt load | - | - | - | - | - | - | 0.01 | 0.03 | 0.787 |
| **R²** | 0.062 |  |  | 0.095 |  |  | 0.078 |  |  |
| **24-hour urinary potassium (g/day)** | | | | | | | | | |
| Intercept | -0.14 | 0.47 | 0.768 | -0.86 | 0.64 | 0.176 | -0.29 | 0.40 | 0.462 |
| School lunch frequency | 0.07 | 0.05 | 0.121 | -0.01 | 0.02 | 0.482 | -0.02 | 0.02 | 0.373 |
| Family salt load | 0.00 | 0.02 | 0.880 | -0.01 | 0.00 | 0.159 | -0.01 | 0.00 | 0.099 |
| Age | -0.00 | 0.06 | 0.936 | 0.12 | 0.07 | 0.079 | 0.05 | 0.05 | 0.256 |
| Male sex | -0.02 | 0.11 | 0.830 | 0.09 | 0.07 | 0.249 | 0.03 | 0.07 | 0.681 |
| Intervention group | - | - | - | - | - | - | -0.37 | 0.27 | 0.169 |
| Group x School lunch | - | - | - | - | - | - | 0.10 | 0.05 | 0.048* |
| Group x Family salt load | - | - | - | - | - | - | 0.01 | 0.02 | 0.462 |
| **R²** | 0.071 |  |  | 0.079 |  |  | 0.070 |  |  |
| **24-hour urinary creatinine (g/day)** | | | | | | | | | |
| Intercept | 0.02 | 0.30 | 0.934 | -0.26 | 0.42 | 0.548 | -0.10 | 0.25 | 0.694 |
| School lunch frequency | 0.01 | 0.04 | 0.782 | 0.00 | 0.01 | 0.679 | 0.00 | 0.01 | 0.733 |
| Family salt load | 0.00 | 0.01 | 0.562 | -0.00 | 0.00 | 0.311 | -0.00 | 0.00 | 0.238 |
| Age | -0.01 | 0.04 | 0.884 | 0.05 | 0.05 | 0.368 | 0.02 | 0.03 | 0.590 |
| Male sex | -0.00 | 0.02 | 0.952 | 0.05 | 0.03 | 0.096 | 0.02 | 0.02 | 0.271 |
| Intervention group | - | - | - | - | - | - | -0.10 | 0.23 | 0.651 |
| Group x School lunch | - | - | - | - | - | - | 0.01 | 0.04 | 0.808 |
| Group x Family salt load | - | - | - | - | - | - | 0.01 | 0.01 | 0.316 |
| **R²** | 0.034 |  |  | 0.121 |  |  | 0.084 |  |  |
| **Urinary sodium-to-potassium ratio** | | | | | | | | | |
| Intercept | 0.04 | 3.87 | 0.991 | 4.24 | 1.33 | 0.001** | 0.94 | 1.98 | 0.637 |
| School lunch frequency | -0.51 | 0.28 | 0.065 | -0.04 | 0.05 | 0.519 | -0.03 | 0.05 | 0.600 |
| Family salt load | -0.01 | 0.03 | 0.665 | -0.02 | 0.01 | 0.212 | -0.02 | 0.01 | 0.216 |
| Age | 0.34 | 0.44 | 0.441 | -0.48 | 0.14 | <0.001*** | -0.06 | 0.26 | 0.822 |
| Male sex | 0.14 | 0.30 | 0.635 | -0.11 | 0.23 | 0.630 | 0.04 | 0.19 | 0.832 |
| Intervention group | - | - | - | - | - | - | 2.46 | 1.44 | 0.086 |
| Group x School lunch | - | - | - | - | - | - | -0.49 | 0.27 | 0.073 |
| Group x Family salt load | - | - | - | - | - | - | 0.00 | 0.03 | 0.961 |
| **R²** | 0.077 |  |  | 0.037 |  |  | 0.055 |  |  |

Note: *P*, unstandardized regression coefficient; *P*, cluster-robust standard error (clustered by school). In-school lunch frequency = 7 − student weekly home lunch frequency at follow-up (days/week). Household salt load = parent 24-h urinary NaCl excretion at baseline (g/day) × student weekly home lunch frequency at follow-up (days/week), representing the total household sodium exposure attributable to home-prepared meals. Male sex is coded as 1 (male) versus 0 (female). The full model includes both intervention and control groups with two-way interaction terms (Intervention × In-school lunch frequency, Intervention × Household salt load). Intervention and control group columns present stratified models. All models adjusted for age, sex, and school-level clustering.
